# Supplementary material for: Pan-PIM Kinase Inhibition Provides a Novel Therapy for Treating Hematologic Cancers
Source: Oxford University Press journal article supplement (doi:10.1158/1078-0432.ccr-13-2062), 2014-01-28
Supplement: 10780432ccr132062-sup-ccr-13-2062figs1-5tabs1-2.pdf [file 10780432ccr132062-sup-ccr-13-2062figs1-5tabs1-2.pdf]

Supplementary Figure 1: Normal vs. Tumor expression of PIM kinases mRNA across 17 tissue types

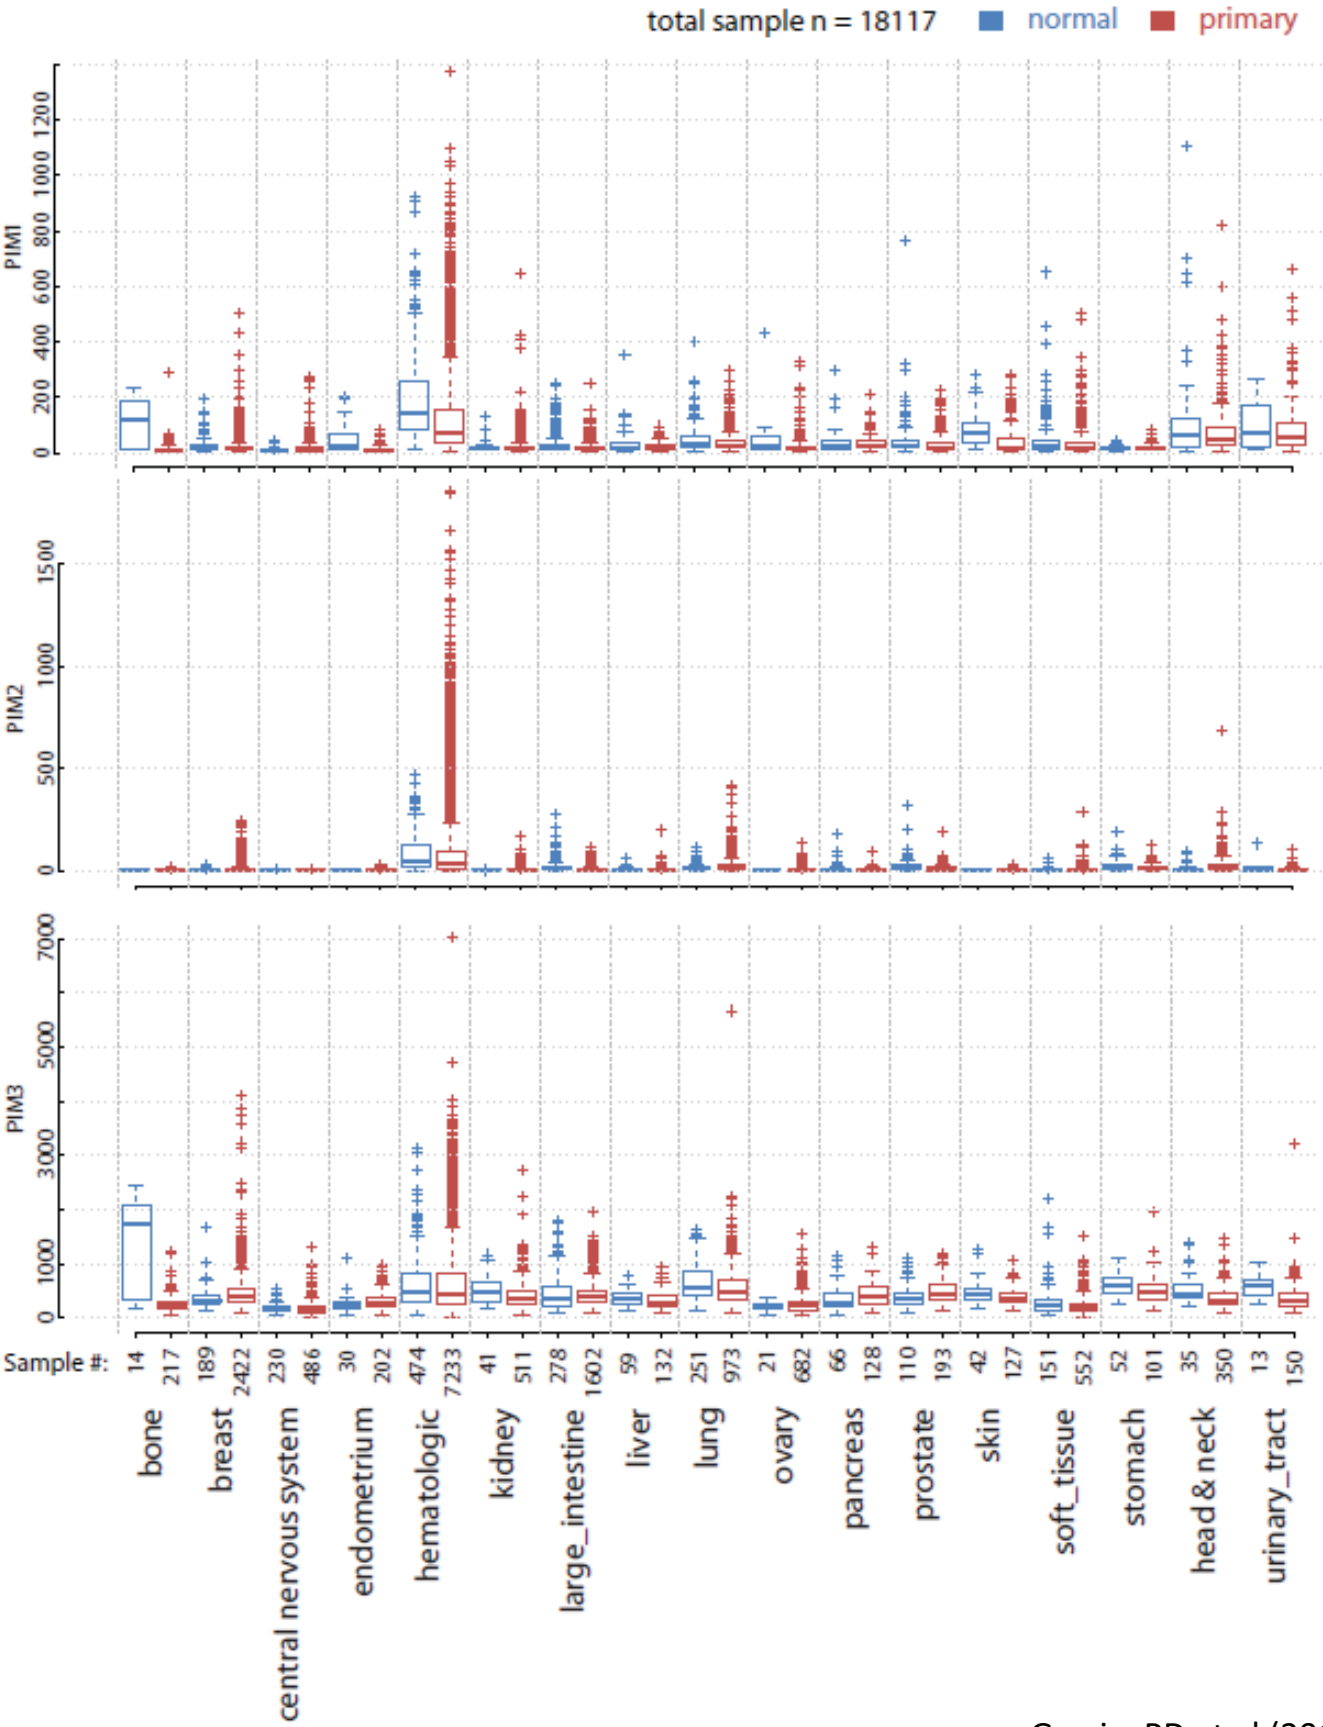

**Supplementary Figure 1 Legend: PIM1, PIM2 and PIM3 mRNA expression**

Expression levels in cancer tissues derived from 17 major organs and their normal counterpart (hematologic tissues are group together) were determined as described in Figure 1 of the main paper text. The number of samples for each tissue type is indicated at the bottom of the figure. The median expression of each gene is represented by the center line within each box, and the first and third quartiles are depicted by the edges of the box. The whiskers extending from each box indicate expression values that are within 1.5 times the inter-quartile range (IQR) from the upper or lower quartile. Outliers that are at a distance of great than  $1.5 \times \text{IQR}$  from the box are plotted individually as plus signs.

Supplementary Figure 2:  
Comparison of LGB321 on-target activity vs. Previously  
described pan-PIM inhibitors

| Compound | PIM1 K <sub>i</sub><br>(nM) | PIM2 K <sub>i</sub><br>(nM) | PIM3 K <sub>i</sub><br>(nM) | KMS11-luc GI <sub>50</sub> (N)<br>(μM) |
|----------|-----------------------------|-----------------------------|-----------------------------|----------------------------------------|
| LGB321   | 0.001                       | 0.002                       | 0.001                       | 0.017 (26)                             |
| SGI-1776 | 16                          | 610                         | 24                          | 4.5 (6)                                |
| AZD1208  | 0.017                       | 0.16                        | 0.23                        | 0.67 (2)                               |

SGI-1776

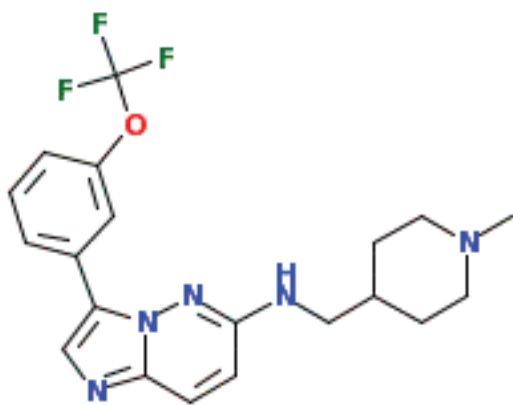

AZD1208

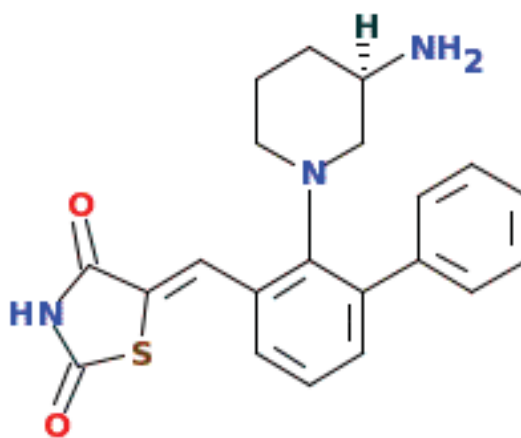

**Supplementary Figure 2 Legend:** The biochemical potency for SGI-1776 and AZD1208 was measured by the same methodology reported for LGB321 in Figure 2. The potency in KMS11-luc cell was determined as in the mail Figure 3.

## Supplementary Figure 3: KINOMESCAN™ of 1 μM LGB321

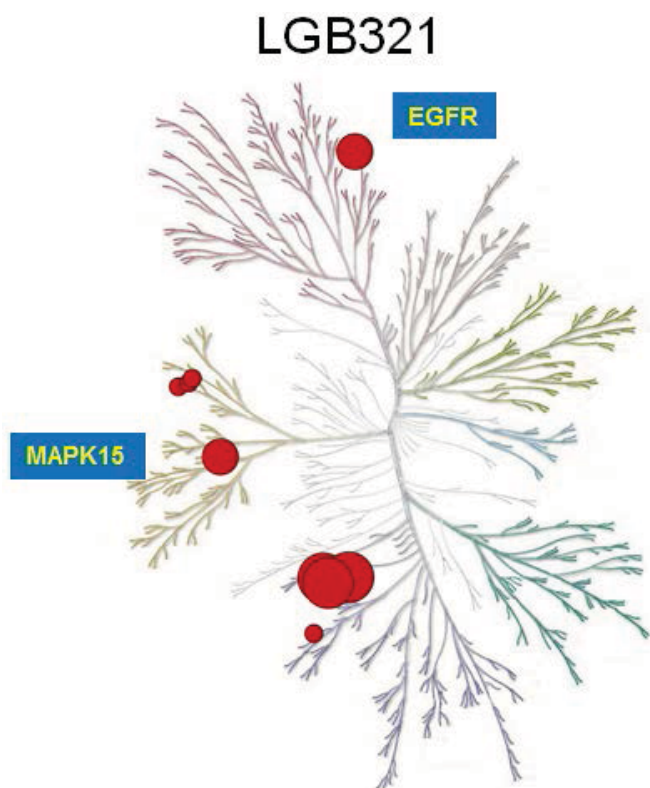

| Ambit Gene Symbol         | Entrez Gene Symbol | Percent Control |
|---------------------------|--------------------|-----------------|
| PIM1                      | PIM1               | 0.5             |
| PIM3                      | PIM3               | 0.5             |
| PIM2                      | PIM2               | 0.75            |
| EGFR(L858R)               | EGFR               | 2.1             |
| ERK8                      | MAPK15             | 2.4             |
| EGFR(L747-E749del, A750P) | EGFR               | 2.5             |
| EGFR                      | EGFR               | 2.6             |
| CLK2                      | CLK2               | 14              |
| CLK4                      | CLK4               | 28              |
| PIK3CB                    | PIK3CB             | 32              |
| CLK1                      | CLK1               | 33              |
| MYLK                      | MYLK               | 34              |
| NLK                       | NLK                | 36              |
| PRKD3                     | PRKD3              | 40              |

| Selectivity score type | # of Hits | # of non-mutant kinases | Selectivity Score |
|------------------------|-----------|-------------------------|-------------------|
| < 35 % of control      | 10        | 386                     | 0.026             |
| < 10 % of control      | 5         | 386                     | 0.013             |
| < 1 % of control       | 3         | 386                     | 0.008             |

**Supplementary Figure 3 Legend:** The complete data set, including all kinases tested in this assay, was published in Burger MT, Han W, Lan J, et al. Structure Guided Optimization, in Vitro Activity, and in Vivo Activity of Pan-PIM Kinase Inhibitors. ACS Med Chem Lett 2013.

For a more detailed description of KINOMESCAN's assay technology, see Fabian et al. A small molecule-kinase interaction map for clinical kinase inhibitors. Nat. Biotechnol. 23, 329-336 (2005).

# Supplementary Figure 4: Biochemical and cellular selectivity of the LGB321 PIM inhibitor series towards GSK3 $\beta$

## A. Pan-PIM inhibitor series

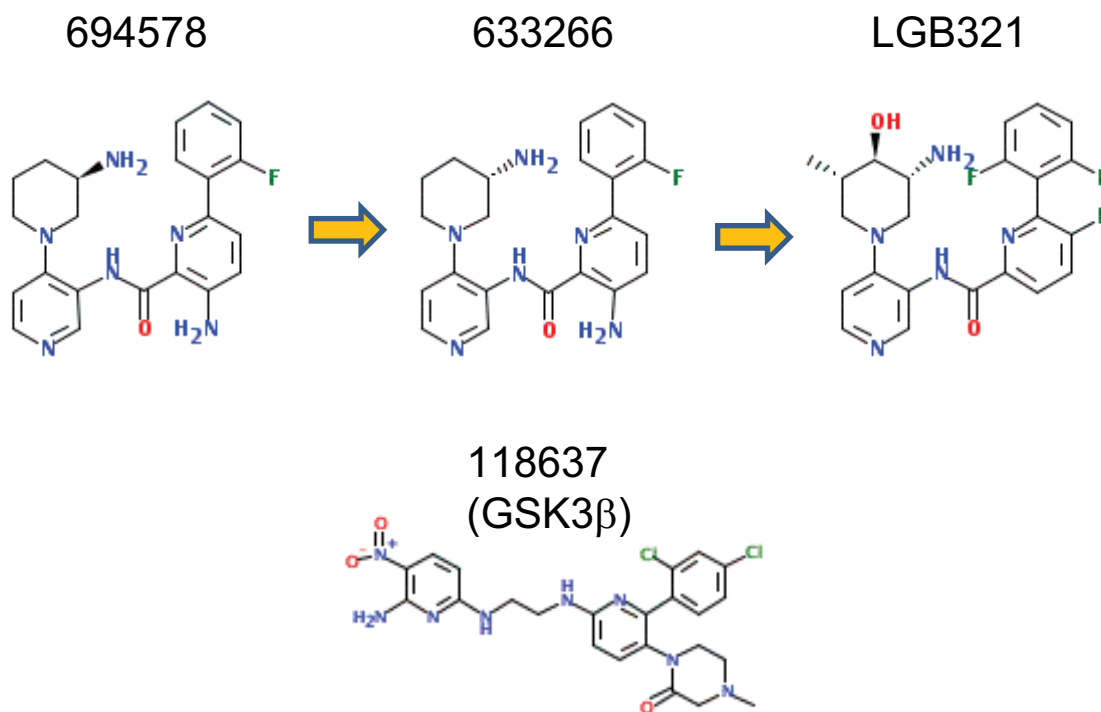

## B.

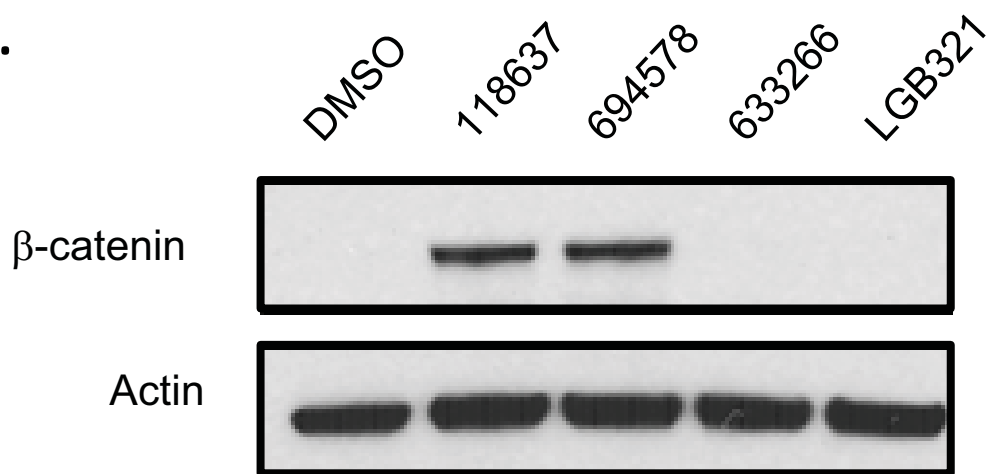

C.

|                                     | 118637 | 694578 | 633266 | LGB321 |
|-------------------------------------|--------|--------|--------|--------|
| PIM2 (IC <sub>50</sub> )            | N.D.   | 0.031  | <0.002 | <0.002 |
| GSK3β (IC <sub>50</sub> )           | <0.003 | <0.003 | 0.013  | 4.4    |
| GSK3β (EC <sub>50</sub> ) / MV 4-11 | 0.33   | N.D    | N.D.   | >20    |

**Supplementary Figure 4 Legend – Biochemical and cellular selectivity of the LGB321 PIM inhibitor series towards GSK3β**

Cellular inhibition of GSK3β results in stabilization of β-catenin<sup>1</sup>. Compounds from the PIM inhibitor series (694578, 633266 & LGB321) were tested along with a control GSK3β inhibitor (118637)<sup>2</sup> on MV-411 cells for β-catenin stabilization. A) Representative compounds from the PIM series leading to LGB321. B) Western blot analysis of β-catenin levels in MV-411 cells after treatment with the control GSK3β inhibitor or PIM compounds. C) Activity table of the control GSK3β inhibitor and PIM compounds in PIM2 & GSK3β biochemical assays as well as a quantitative (MSD assay similar to the ones described for BAD and S6RP in main paper text) cellular assay for GSK3β inhibition.

References List

1. Yeow K, Novo-Perez L, Gaillard P et al. A cellular assay for measuring the inhibition of glycogen synthase kinase-3 via the accumulation of beta-catenin in Chinese hamster ovary clone K1 cells. *Assay. Drug Dev. Technol.* (2006) 4:451-460.
2. Wagman AS, Johnson KW, Bussiere DE. Discovery and development of GSK3 inhibitors for the treatment of type 2 diabetes. *Curr. Pharm. Des* (2004)10:1105-1137.

## Supplementary Figure 5: LGB321 does not inhibit EGFR signaling in HCC1954 cells

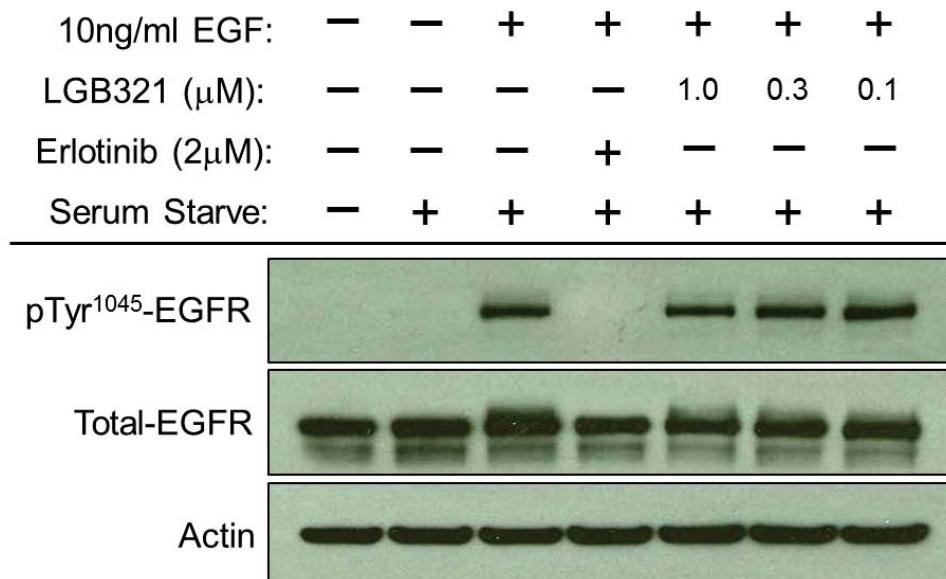

### Supplementary Figure Legend 5

HCC1954 breast carcinoma cells were serum starved overnight and then treated for 3 hours with either the EGFR inhibitor Erlotinib (2  $\mu$ M) as a positive control, or a the pan PIM inhibitor LGB321 (1, 0.3 or 0.1  $\mu$ M). Cells were then stimulated for 15 minutes with 10 ng/mL EGF followed by 30 minutes of lysis at 4°C. Cleared lysates (20 ug/lane) were then resolved by SDS-PAGE and transferred to a nitrocellulose membrane for Western blotting using commercial antibodies.

# Supplementary Table 1:

## Sensitivity to LGB321 and Erlotinib of Lung Cells in the CCLE

| Cell Line | Erlotinib [GI <sub>50</sub> (μM)] | LGB321 [GI <sub>50</sub> (μM)] |
|-----------|-----------------------------------|--------------------------------|
| HCC827    | 0.07                              | >8                             |
| HCC4006   | 0.07                              | N.D.                           |
| NCI-H3255 | 0.08                              | >8                             |
| PC-14     | 0.08                              | >8                             |
| NCI-H1666 | 0.20                              | >8                             |
| CAL-12T   | 0.30                              | >8                             |
| NCI-H1734 | 0.31                              | >8                             |
| NCI-H2073 | 0.44                              | >8                             |
| SK-MES-1  | 0.66                              | >8                             |
| NCI-H322  | 0.67                              | >8                             |
| NCI-H1573 | 0.85                              | >8                             |
| NCI-H1944 | 0.87                              | >8                             |
| LUDLU-1   | 0.88                              | >8                             |
| HARA      | 0.99                              | >8                             |
| Calu-3    | 1.1                               | >8                             |
| DMS 53    | N.D.                              | 0.05                           |
| VMRC-LCD  | >8                                | 0.05                           |
| NCI-H1155 | >8                                | 1.8                            |
| MOR/CPR   | >8                                | 3.2                            |
| NCI-H810  | >8                                | 4.3                            |
| NCI-H889  | >8                                | 4.9                            |
| COR-L279  | N.D.                              | 6.3                            |
| EBC-1     | >8                                | 6.7                            |



# Supplementary Table 2

## Sensitivity to LGB321 of hematological malignancies cell lines

| Cell line    | LGB321 [GI <sub>50</sub> (μM)] | Malignancy type | Other Annotations |
|--------------|--------------------------------|-----------------|-------------------|
| CCRF-HSB-2   | 0.014                          | T-ALL           |                   |
| HH           | 0.059                          | CTLC            |                   |
| 697          | 0.092                          | pre-B-ALL       |                   |
| RCH-ACV      | 0.26                           | pre-B-ALL       |                   |
| SEM          | 1.3                            | B-ALL           |                   |
| JURKAT       | 2.8                            | T-ALL           |                   |
| RPMI-8402    | 3.2                            | B-ALL           |                   |
| MOLT-16      | 3.5                            | T-ALL           |                   |
| PEER         | 4.3                            | T-ALL           |                   |
| RS4;11       | 5.4                            | B-ALL           |                   |
| KE-37        | 5.9                            | T-ALL           |                   |
| MOLT-4       | 7.4                            | T-ALL           |                   |
| MOLT3        | 9.7                            | T-ALL           |                   |
| CCRF-CEM     | 10                             | T-ALL           |                   |
| CEMC1        | 10                             | T-ALL           |                   |
| HPB-ALL      | 10                             | T-ALL           |                   |
| Loucy        | 10                             | T-ALL           |                   |
| P12-ICHIKAWA | 10                             | T-ALL           |                   |
| PF-382       | 10                             | T-ALL           |                   |
| Reh          | 10                             | B-ALL           |                   |
| SUP-T1       | 10                             | T-ALL           |                   |
| M-07e        | 0.014                          | AML             |                   |
| NOMO-1       | 0.014                          | AML             |                   |
| MOLM-16      | 0.014                          | AML             |                   |
| KG-1         | 0.014                          | AML             |                   |
| UKE1         | 0.014                          | AML             | JAK2-V617F        |
| EOL-1        | 0.014                          | AML             |                   |
| MV-4-11      | 0.021                          | AML             | Flt3-ITD          |
| Set-2        | 0.031                          | AML             | JAK2-V617F        |
| CMK          | 0.041                          | AML             |                   |
| CMK-11-5     | 0.12                           | AML             |                   |
| HEL 92.1.7   | 0.16                           | AML             | JAK2-V617F        |
| OCI-M1       | 0.20                           | AML             |                   |
| MUTZ-8       | 0.20                           | AML             |                   |
| TF-1         | 0.37                           | AML             |                   |
| OCI-AML-3    | 0.58                           | AML             |                   |
| MOLM-13      | 0.69                           | AML             | Flt3-ITD          |
| MONO-MAC-1   | 1.1                            | AML             |                   |
| THP-1        | 1.3                            | AML             |                   |
| OCI-AML2     | 3.1                            | AML             |                   |
| SKM-1        | 3.7                            | AML             |                   |
| PL-21        | 5.1                            | AML             |                   |

# Supplementary Table 2 (cont.)

|             | Cell line | LGB321 [GI <sub>50</sub> (μM)] | Malignancy type  | Other Annotations |
|-------------|-----------|--------------------------------|------------------|-------------------|
| AML (cont.) | F-36P     | 6.0                            | AML              |                   |
|             | SIG-M5    | 7.6                            | AML              |                   |
|             | P31/FUJ   | 8.8                            | AML              |                   |
|             | NB-4      | 9.1                            | AML              |                   |
|             | OCI-AML5  | 10                             | AML              |                   |
| CML         | MOLM-6    | 0.014                          | CML              | BCR-ABL positive  |
|             | JURL-MK1  | 0.014                          | CML              | BCR-ABL positive  |
|             | BV-173    | 0.055                          | CML              | BCR-ABL positive  |
|             | KYO-1     | 0.26                           | CML              | BCR-ABL positive  |
|             | LAMA-84   | 0.27                           | CML              | BCR-ABL positive  |
|             | EM-2      | 1.2                            | CML              | BCR-ABL positive  |
|             | K-562     | 3.1                            | CML              | BCR-ABL positive  |
|             | MEG-01    | 3.6                            | CML              | BCR-ABL positive  |
|             | KCL-22    | 4.8                            | CML              | BCR-ABL positive  |
|             | CML-T1    | 5.9                            | CML              | BCR-ABL positive  |
| HL          | L-428     | 0.037                          | Hodgkin Lymphoma |                   |
|             | L-540     | 0.082                          | Hodgkin Lymphoma |                   |
|             | L-1236    | 3.6                            | Hodgkin Lymphoma |                   |
|             | HD-MY-Z   | 10                             | Hodgkin Lymphoma |                   |
| MM          | KMS-26    | 0.020                          | MM               |                   |
|             | LP-1      | 0.032                          | MM               |                   |
|             | MOLP-8    | 0.058                          | MM               |                   |
|             | RPMI 8226 | 0.068                          | MM               |                   |
|             | KMS-20    | 0.073                          | MM               |                   |
|             | KMS-12-BM | 0.12                           | MM               |                   |
|             | KMS-28BM  | 0.15                           | MM               |                   |
|             | KMS-34    | 0.16                           | MM               |                   |
|             | MM1-S     | 0.20                           | MM               |                   |
|             | KMS-21BM  | 0.24                           | MM               |                   |
|             | AMO-1     | 0.27                           | MM               |                   |
|             | NCI-H929  | 0.27                           | MM               |                   |
|             | KMS-11    | 0.41                           | MM               |                   |
|             | EJM       | 0.65                           | MM               |                   |
|             | L-363     | 1.00                           | MM               |                   |
|             | KMM-1     | 1.8                            | MM               |                   |
|             | KMS-27    | 2.5                            | MM               |                   |
|             | KHM-1B    | 10                             | MM               |                   |
|             | OPM-2     | 10                             | MM               |                   |
| B-cell NHL  | JM1       | 0.014                          | DLBCL-GC         |                   |
|             | CA46      | 0.014                          | Burkitt Lymphoma |                   |
|             | U-2932    | 0.036                          | DLBCL-ABC        | TAK               |
|             | Toledo    | 0.071                          | DLBCL-GC         | BCL2              |
|             | HBL-1     | 0.23                           | DLBCL-ABC        | CD79+MyD88        |

## Supplementary Table 2 (cont.)

|                    | Cell line   | LGB321 [GI <sub>50</sub> (μM)] | Malignancy type      | Other Annotations |
|--------------------|-------------|--------------------------------|----------------------|-------------------|
| B-cell NHL (cont.) | JeKo-1      | 0.25                           | MCL                  |                   |
|                    | DOHH-2      | 0.26                           | DLBCL-GC             |                   |
|                    | RIVA        | 0.32                           | DLBCL-ABC            |                   |
|                    | SU-DHL-8    | 0.40                           | DLBCL-ABC            |                   |
|                    | SU-DHL-2    | 0.47                           | DLBCL-ABC            | A20               |
|                    | Z-138       | 1.2                            | MCL                  |                   |
|                    | SSK41       | 1.6                            | B-Cell NHL undefined |                   |
|                    | BL-70       | 3.0                            | Burkitt Lymphoma     |                   |
|                    | Mino        | 3.4                            | MCL                  |                   |
|                    | SU-DHL-4    | 4.0                            | DLBCL-GC             | Tonic BCR         |
|                    | RL          | 4.1                            | DLBCL-GC             |                   |
|                    | BL-41       | 4.1                            | Burkitt Lymphoma     |                   |
|                    | NU-DHL-1    | 4.2                            | DLBCL-GC             |                   |
|                    | WSU-DLCL2   | 4.3                            | DLBCL-GC             |                   |
|                    | HT          | 5.3                            | DLBCL-GC             |                   |
|                    | OCI-LY3     | 5.4                            | DLBCL-ABC            | CARD11            |
|                    | U-937       | 6.0                            | DLBCL-GC             |                   |
|                    | SU-DHL-5    | 6.6                            | DLBCL-ABC            |                   |
|                    | BJAB        | 7.7                            | DLBCL-GC             |                   |
|                    | DB          | 8.2                            | DLBCL-GC             | BCL2              |
| MC116              | 10          | B-Cell NHL undefined           |                      |                   |
| SU-DHL-10          | 10          | DLBCL-GC                       |                      |                   |
| T-cell NHL         | SR-786      | 0.44                           | T-Cell ALCL          |                   |
|                    | KARPAS -299 | 2.7                            | T-Cell ALCL          |                   |
|                    | SUP-T11     | 4.9                            | T-Cell ALCL          |                   |
|                    | SU-DHL-1    | 6.0                            | T-Cell ALCL          |                   |
|                    | DEL         | 6.1                            | T-Cell ALCL          |                   |
